# Supplementary material
Source: PubMed Central journal article supplement (PMC2905128)
Supplement: mmc1.pdf [file mmc1.pdf]

Biophysical Journal, Volume 99

**Supporting Material**

**Redox-regulated heterogeneous thresholds for ligand recruitment among InsP3R  
Ca<sup>2+</sup> release channels**

Horia Vais, Adam P. Siebert, Zhongming Ma, Marisabel Fernández-Mongil, J. Kevin Foskett, and Don-On Daniel Mak

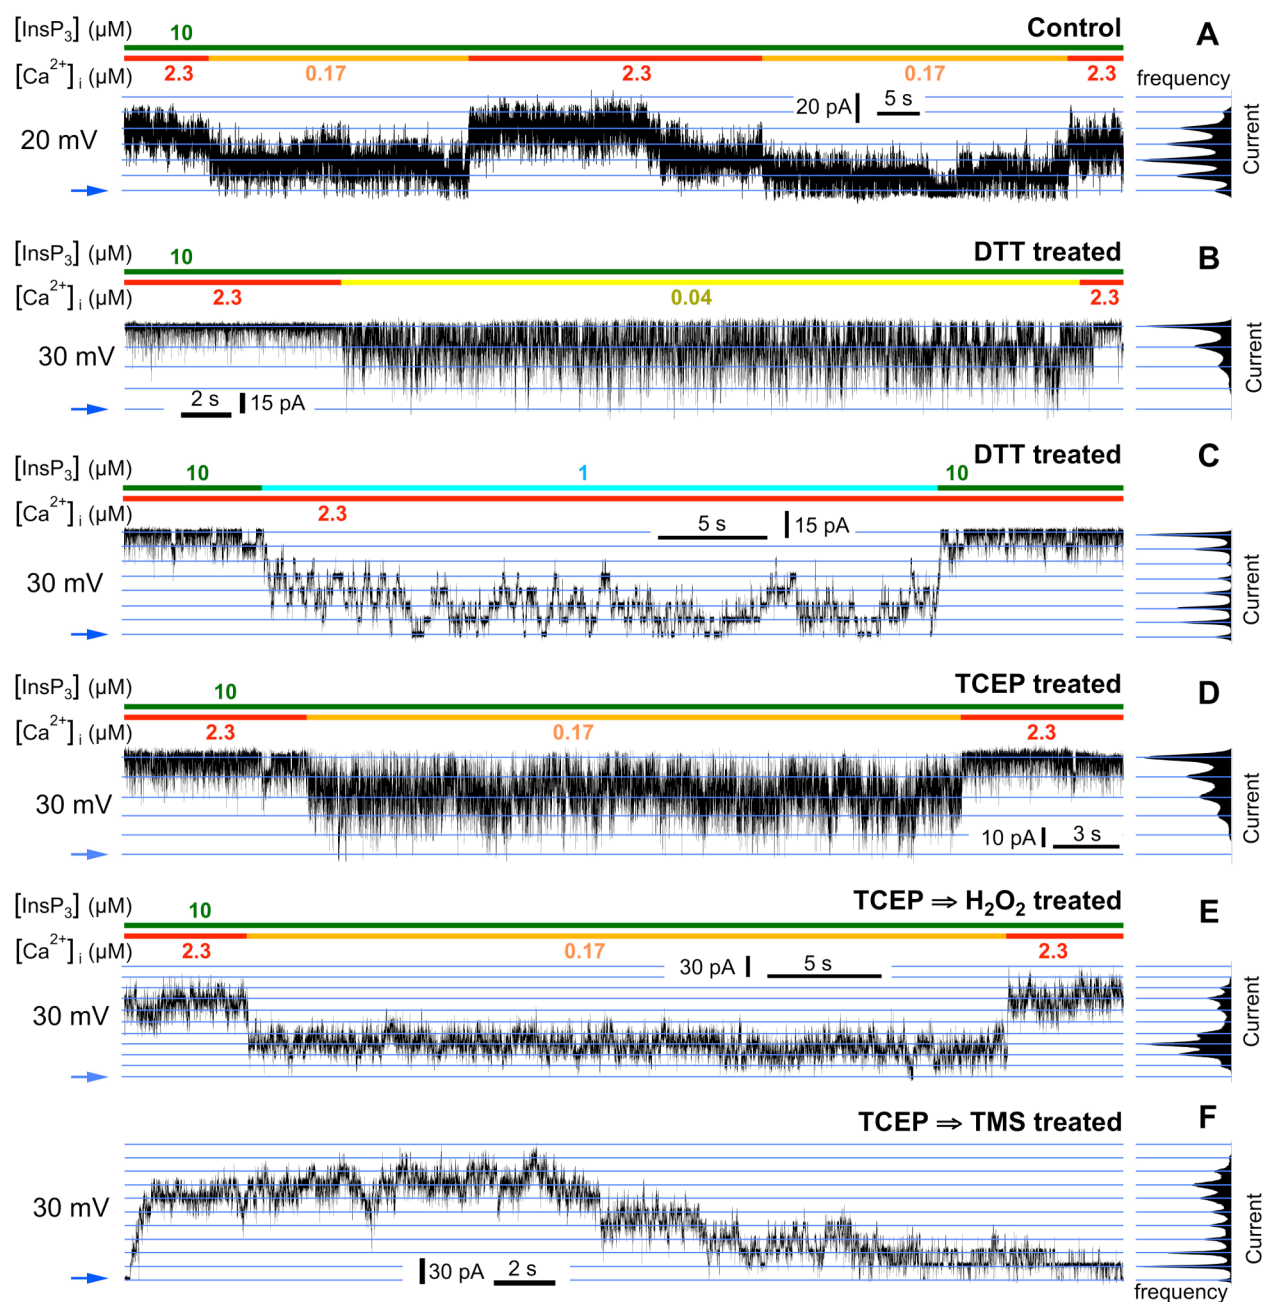

FIGURE S1 Current traces of homotetrameric recombinant  $\text{InsP}_3\text{R-3}$  channels in cyto-out membrane patches obtained from isolated DT40-KO-r- $\text{InsP}_3\text{R-3}$  nuclei. (A) Current trace showing reversible changes in  $N_A$  when  $\text{InsP}_3\text{R-3}$  channels were alternately exposed to optimal (2.3  $\mu\text{M}$ ) and sub-optimal (170 nM)  $[\text{Ca}^{2+}]_i$ . (B) Current trace showing the lack of change in  $N_A$  when  $\text{InsP}_3\text{R-3}$  channels were alternately exposed to optimal and resting (40 nM)  $[\text{Ca}^{2+}]_i$  after DTT treatment (3 mM for > 60 min). (C) Current trace showing reversible decrease in  $N_A$  when DTT-treated channels were exposed to extreme reduction of  $[\text{InsP}_3]$  from 10 to 1  $\mu\text{M}$ . (D) Current trace showing the absence of change in  $N_A$  when channels were alternately exposed to optimal and sub-optimal  $[\text{Ca}^{2+}]_i$  after TCEP treatment (6 mM for > 90 min). (E) Current trace showing the restoration of change in  $N_A$  when  $\text{InsP}_3\text{R-3}$  channels were alternately exposed to optimal and sub-optimal  $[\text{Ca}^{2+}]_i$  after treatment with TCEP (6 mM for 120 min) and then  $\text{H}_2\text{O}_2$  (5 mM for 60 min). (F) Current trace showing channel inactivation in constant presence of optimal  $[\text{InsP}_3]$  (10  $\mu\text{M}$ ) and  $[\text{Ca}^{2+}]_i$  (2.3  $\mu\text{M}$ ) after treatment with TCEP (6 mM for 120 min) and then TMS (100  $\mu\text{M}$  for 60 min). At least 10 channels were activated by a jump in  $[\text{InsP}_3]$  from 0 to 10  $\mu\text{M}$  at the beginning of the trace.
